# Supplementary material for: Sensitized terbium(iii) macrocyclic-phthalimide complexes as luminescent pH switches
Source: Royal Society of Chemistry journal article supplement (doi:10.1039/c3dt51236c), 2013-01-01
Supplement: c3dt51236c.pdf [file c3dt51236c.pdf]

## Supporting Information

Sensitized terbium (III) macrocyclic-phthalimide complexes as luminescent pH switches

Gaoyun Chen,<sup>a</sup> Nicholas J. Wardle,<sup>a</sup> Jason Sarris,<sup>a</sup> Nicholas P. Chatterton,<sup>\*a</sup> S. W. Annie Bligh,<sup>\*a,b</sup>

<sup>a</sup>School of Human Sciences, Faculty of Life Sciences and Computing, London Metropolitan University, 166-220 Holloway Road, London, UK, N7 8DB. Fax: +44 (0)20 7133 4149; Tel:+44 (0)207 133 4373; E-mail: n.chatterton@londonmet.ac.uk

<sup>b</sup>School of Life Sciences, University of Westminster, 115 New Cavendish Street, London W1W 6UW. Tel: +44 207 911 5038; E-mail: a.bligh@westminster.ac.uk

### **$^1\text{H}$ NMR study on the kinetics of the hydrolysis of lanthanum (III) complexes of $\text{L}^{1\text{a}}$**

The samples of  $\text{LaL}^{1\text{a}}$  were prepared by mixing 0.02 M stock solutions of  $\text{La(III)}$  and  $\text{L}^{1\text{a}}$  in  $\text{D}_2\text{O}$  in equivolumes. The initial pD was 2.5 and the  $^1\text{H}$  NMR spectrum, recorded at room temperature, was obtained after a period 5 minutes after the pD had stabilized. The  $^1\text{H}$  NMR of the sample was then re-run every 5 minutes for a total period of 1 hour. A second, fresh solution  $\text{LaL}^{1\text{a}}$  in  $\text{D}_2\text{O}$  was prepared in the same way and then the pD was adjusted by addition of  $\text{NaOD}$  (0.5 M) to 4.6. The  $^1\text{H}$  NMR spectrum was recorded 5 minutes after the pD had stabilized and the  $^1\text{H}$  NMR of the sample was re-recorded every 5 minutes for a total period of 1 hour. Similar experiments were carried out at pD 6.5, 8.2, 9.8 and 11.1 respectively.

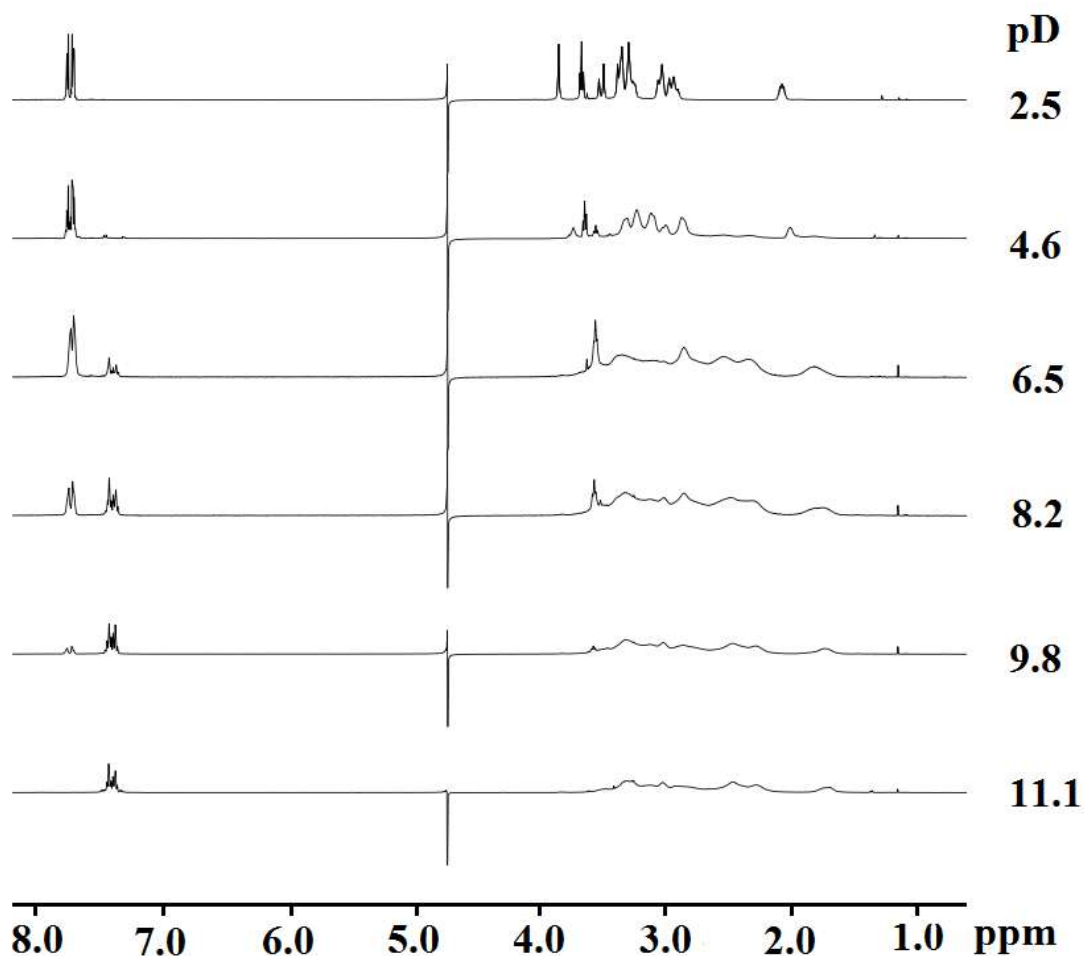

Figure S1.  $^1\text{H}$  NMR ( $\text{D}_2\text{O}$ ) spectra of  $\text{LaL}^{1\text{a}}$  at various pD recorded 5 minutes after stabilization of pD; all subsequent NMR spectra from later time points were identical indicating equilibrium established within 5 minutes.
